# Supplementary material
Source: MDPI journal article supplement (https://www.mdpi.com/2073-4344/12/3/327)
Supplement: s1 [file s1]

# Influence of the Support on Propene Oxidation over Gold Catalysts

Ewoud J. J. de Boed, Bryan J. Folmer, Min Tang, Baira Donoeva and Petra E. de Jongh \*

Materials Chemistry and Catalysis, Debye Institute for Nanomaterials Science, Utrecht University, Universiteitsweg 99, 3584CG Utrecht, The Netherlands; e.j.j.deboed@uu.nl (E.J.J.d.B.); b.j.folmer@uu.nl (B.J.F.); m.tang@uu.nl (M.T.); baira.donoeva@gmail.com (B.D.)

\* Correspondence: [p.e.dejongh@uu.nl](mailto:p.e.dejongh@uu.nl)

**Abstract:** The epoxidation of propene without forming a substantial amount of byproducts is one of the holy grails of catalysis. Supported Cu, Ag and Au catalysts are studied for this reaction and the activity of the supported metals is generally well understood. On the contrary, limited information is available on the influence of the support on the epoxide selectivity. The reaction of propene with equal amounts of hydrogen and oxygen was tested over gold nanoparticles deposited onto CeO<sub>2</sub>, TiO<sub>2</sub>, WO<sub>3</sub>,  $\gamma$ -Al<sub>2</sub>O<sub>3</sub>, SiO<sub>2</sub>, TiO<sub>2</sub>-SiO<sub>2</sub> and titanosilicate-1. Several metal oxide supports caused further conversion of the synthesized propene oxide. Strongly acidic supports, such as WO<sub>3</sub> and titanosilicate-1, catalyzed the isomerization of propene oxide towards propanal and acetone. Key factors for achieving high PO selectivity are having inert or neutralized surface sites, a low specific surface and/or a low density of surface -OH groups. This work provides insights and practical guidelines to which metal oxide support properties lead to which products in the reaction of propene in the presence of oxygen and hydrogen over supported gold catalysts.

**Keywords:** epoxidation; propene oxide; gold nanoparticles; support effects

---

## S1. Mass titrations

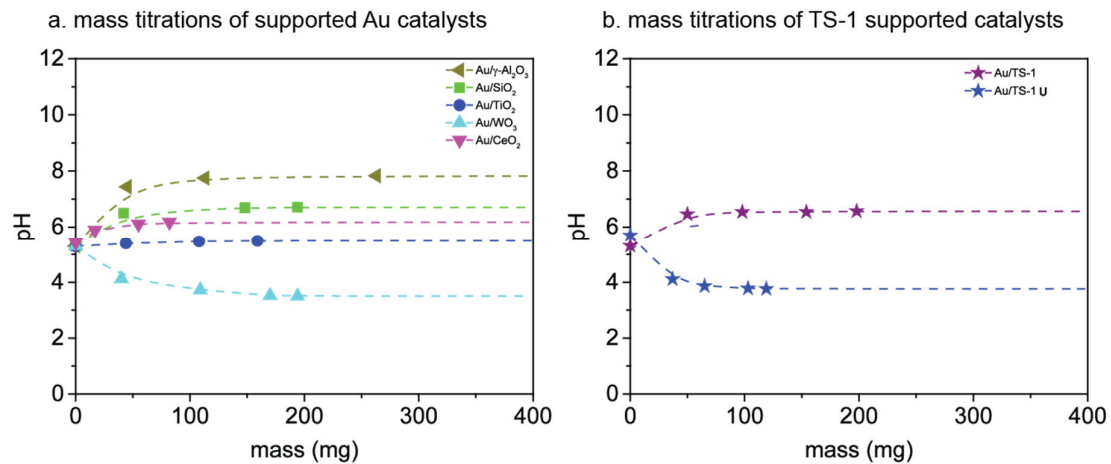

**Figure S1.** Point-of-zero-charge determinations of the supported Au catalysts using a 0.1 M KCl solution. Dashed lines were drawn to guide the eye.

## S2. Additional TEM images

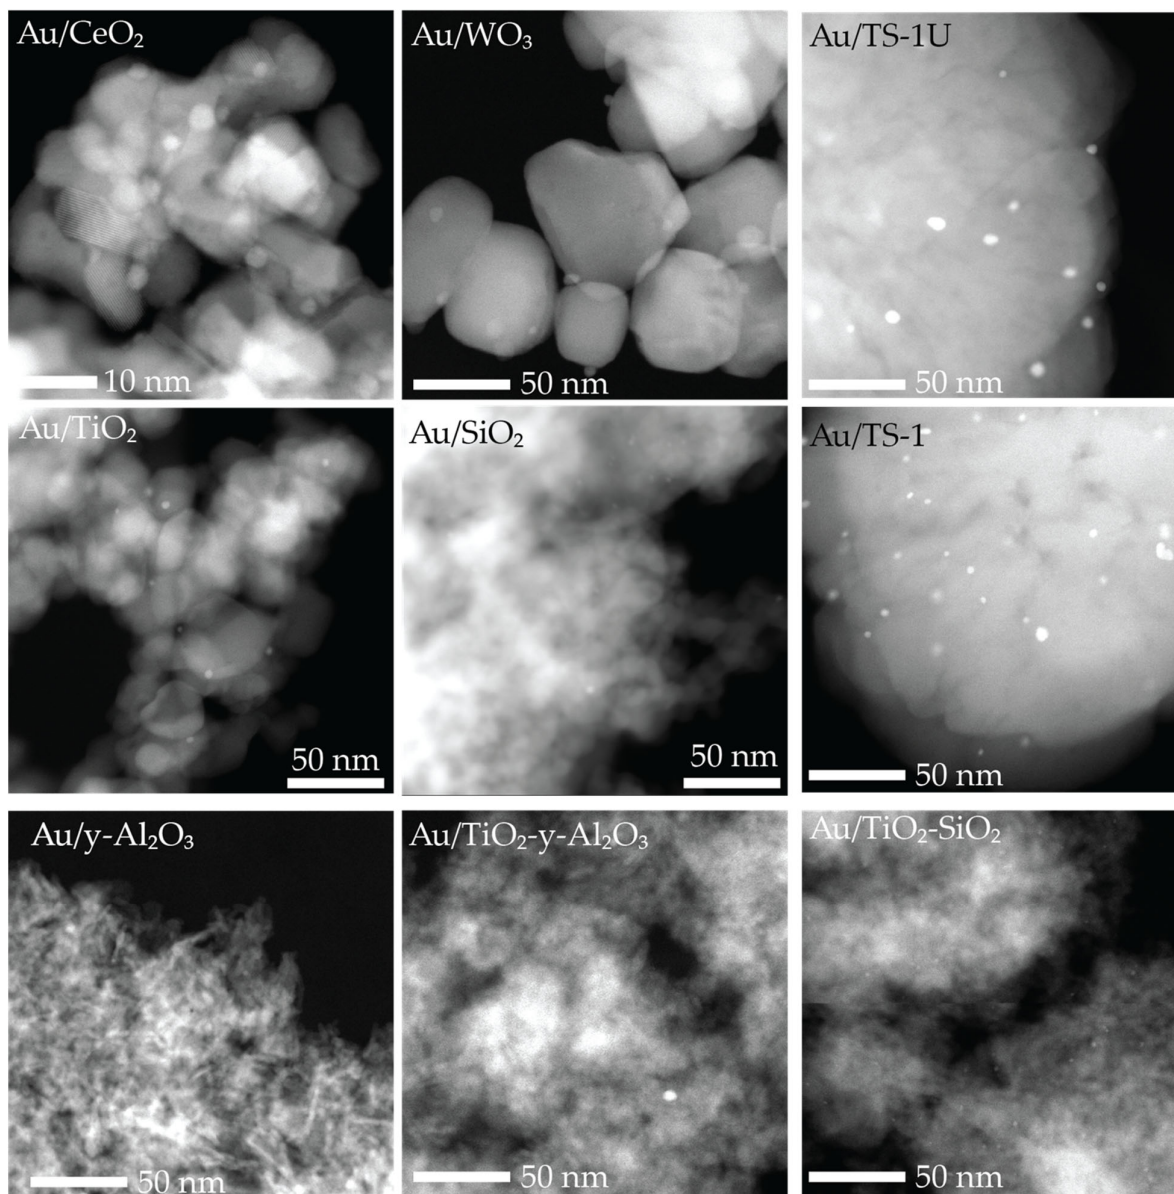

**Figure S2.** High Angle Annular Dark Field Scanning Transmission Electron Microscopy images of the indicated metal oxide supported gold catalysts.

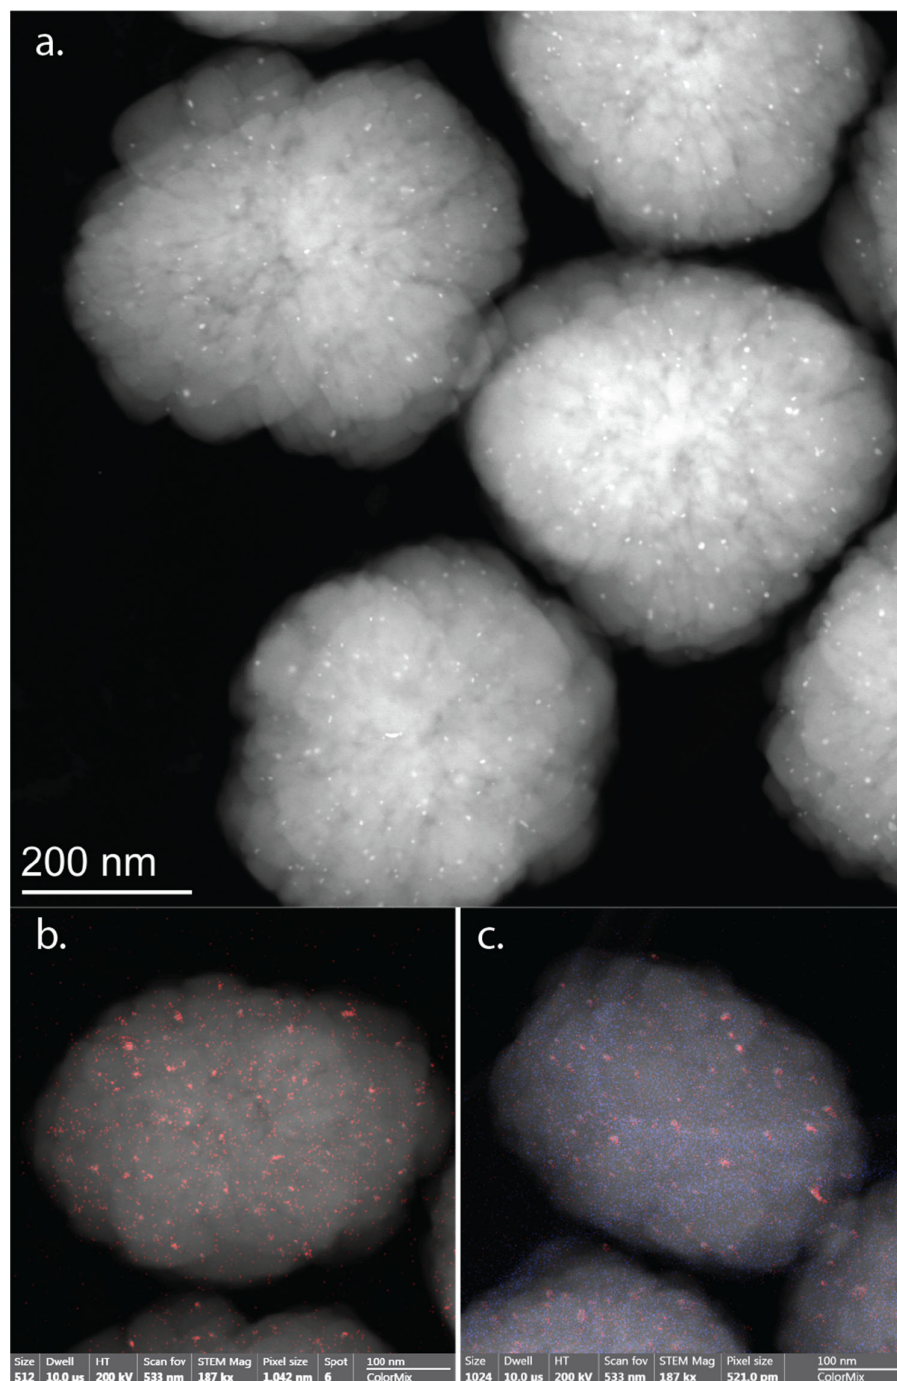

**Figure S3.** High Angle Annular Dark Field Scanning Transmission Electron Microscopy images of Au/TS1. (a). at low magnification, (b). energy dispersive X-ray spectroscopy (EDX) chemical map showing Au as the red dots, (c). EDX chemical map showing Au in red and Na in blue.

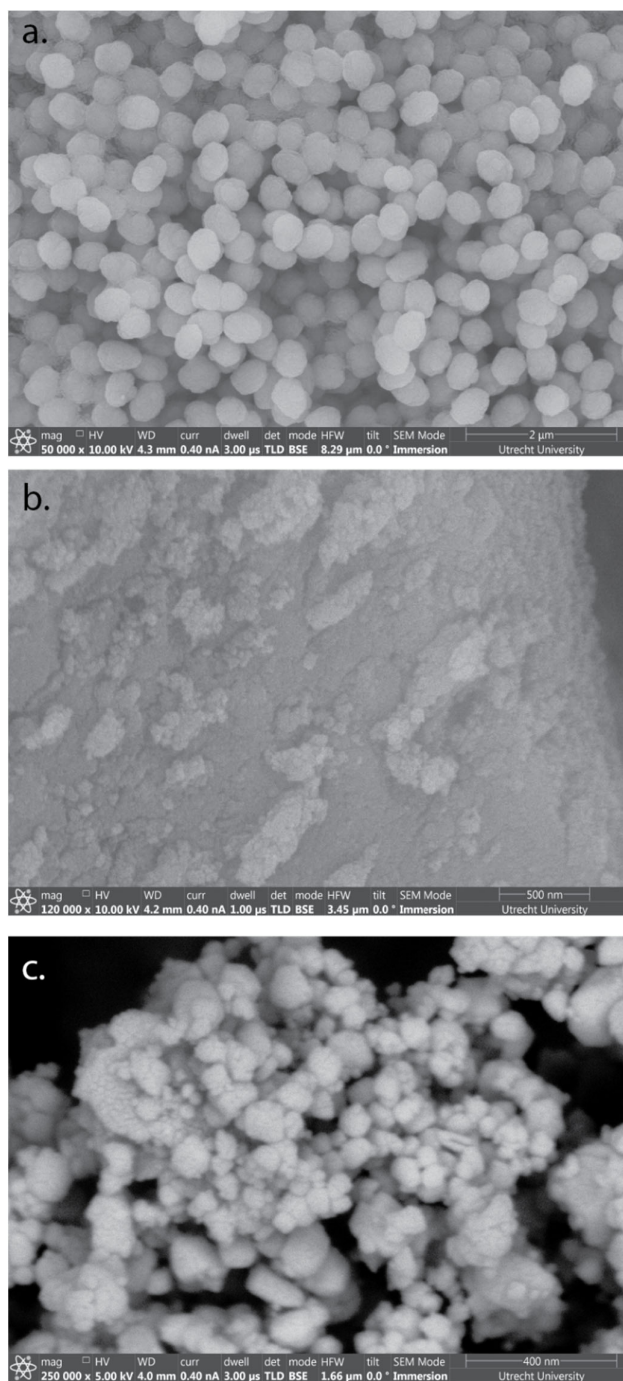

**Figure S4.** Scanning Electron Microscopy images of selected metal oxide supported gold catalysts (a). Au/TS-1, (b). Au/SiO<sub>2</sub>, (c). Au/WO<sub>3</sub>.

### S3. Catalytic data

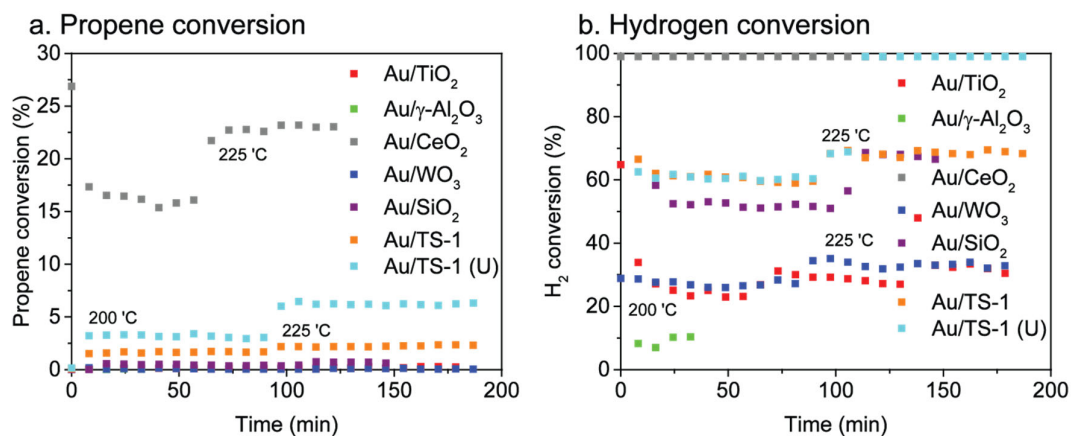

**Figure S5.** Conversion during propene (a) and hydrogen (b) oxidation over supported gold catalysts. Conditions: 150 mg of catalyst, 10,000 mL/g<sub>cat</sub>/h flow of 10% of each C<sub>3</sub>H<sub>6</sub>, O<sub>2</sub> and H<sub>2</sub> in He at 200 °C-225 °C. 25 mg of Au/CeO<sub>2</sub> was used.

**Table S1.** Oxidation of propene at 200 °C in the presence of the supported gold catalysts<sup>a</sup>.

| Catalyst                                                       | TOF (s <sup>-1</sup> ) <sup>b</sup> |                | Conversion (%) <sup>c</sup>   |                | Product selectivity (%) <sup>d</sup> |                      |                             |          |
|----------------------------------------------------------------|-------------------------------------|----------------|-------------------------------|----------------|--------------------------------------|----------------------|-----------------------------|----------|
|                                                                | C <sub>3</sub> H <sub>6</sub>       | H <sub>2</sub> | C <sub>3</sub> H <sub>6</sub> | H <sub>2</sub> | PO                                   | Isomers <sup>e</sup> | Over-oxidation <sup>f</sup> | Acrolein |
| Au/CeO <sub>2</sub> <sup>†</sup>                               | 0.28                                | 1.28           | 17.4                          | >99            | 0                                    | 0.2                  | 99.8                        | 0        |
| Au/WO <sub>3</sub>                                             | 0.01                                | 1.40           | < 0.1                         | 27.2           | 0                                    | 28.3                 | 71.7                        | 0        |
| Au/TiO <sub>2</sub>                                            | 0.01                                | 3.10           | 0.2                           | 34.8           | 21.8                                 | 21.7                 | 56.5                        | 0        |
| Au/SiO <sub>2</sub>                                            | 0.04                                | 5.17           | 0.5                           | 52.0           | 8.9                                  | 0                    | 0                           | 78       |
| Au/ $\gamma$ -Al <sub>2</sub> O <sub>3</sub>                   | 0.01                                | 0.03           | < 0.1                         | 8.9            | 0                                    | 64.3                 | 35.7                        | 0        |
| Au/TS-1                                                        | 0.07                                | 2.38           | 1.7                           | 60.5           | 88.9                                 | 9.1                  | 2.1                         | 0        |
| Au/TS-1U                                                       | 0.15                                | 2.50           | 3.0                           | 59.2           | 9.1                                  | 78.3                 | 3.7                         | 8.9      |
| Au/TiO <sub>2</sub> - $\gamma$ -Al <sub>2</sub> O <sub>3</sub> | n.d                                 | n.d            | 0.5                           | 21.9           | 0                                    | 84.0                 | 16.0                        | 0        |
| Au/TiO <sub>2</sub> -SiO <sub>2</sub>                          | n.d                                 | n.d            | 3.6                           | 78.8           | 76.6                                 | 0.3                  | 10.1                        | 13.0     |

<sup>a</sup> Conditions: 150 mg of catalyst, 10,000 mL/g<sub>cat</sub>/h flow of 10% of each C<sub>3</sub>H<sub>6</sub>, O<sub>2</sub> and H<sub>2</sub> in He at 200°C. <sup>b</sup> Turn-over frequency as molecule converted per surface Au atom. <sup>c</sup> Conversion averaged between 60-120 minutes of catalysis. <sup>d</sup> Selectivity averaged between 60-120 minutes of catalysis. <sup>e</sup> Propanal and acetone. <sup>f</sup> Acetaldehyde and CO<sub>2</sub> <sup>†</sup> Only 25 mg of catalyst was used.



**Table S2.** Comparison with Au catalysts that are used for gas phase propene oxidation in literature.

| Catalyst                              | Conditions <sup>a</sup>                                                                                                                                                                      | X C <sub>3</sub> H <sub>6</sub> (%) <sup>b</sup> | PO              | Major sideproducts (selectivity)     | Reference |
|---------------------------------------|----------------------------------------------------------------------------------------------------------------------------------------------------------------------------------------------|--------------------------------------------------|-----------------|--------------------------------------|-----------|
|                                       |                                                                                                                                                                                              |                                                  | selectivity (%) |                                      |           |
| Au/CeO <sub>2</sub>                   | 0.12% C <sub>3</sub> H <sub>6</sub> , 9% O <sub>2</sub> , 294 °C <sup>c</sup>                                                                                                                | 50                                               | 0               | CO <sub>2</sub> (> 99%)              | [1]       |
| Au/CeO <sub>2</sub>                   | 10% H <sub>2</sub> , O <sub>2</sub> , C <sub>3</sub> H <sub>6</sub> , 200 °C <sup>d</sup>                                                                                                    | 17.4                                             | 0               | CO <sub>2</sub> (> 99%)              | This work |
| Au/Al <sub>2</sub> O <sub>3</sub>     | 2.5% C <sub>3</sub> H <sub>6</sub> , 8.5% O <sub>2</sub> , 275 °C <sup>e</sup>                                                                                                               | n.m.                                             | 0               | Mixture of oxygenates <sup>i</sup>   | [2]       |
| Au/Al <sub>2</sub> O <sub>3</sub>     | 10% H <sub>2</sub> , O <sub>2</sub> , C <sub>3</sub> H <sub>6</sub> , 200 °C <sup>f</sup>                                                                                                    | < 0.1                                            | 0               | Mixture of oxygenates <sup>i</sup>   | This work |
| Au/SiO <sub>2</sub>                   | 2.5% C <sub>3</sub> H <sub>6</sub> , 8.5% O <sub>2</sub> , 262 °C <sup>g</sup>                                                                                                               | n.m.                                             | 0               | Acrolein (33%) + others <sup>i</sup> | [2]       |
| Au/SiO <sub>2</sub>                   | 10% H <sub>2</sub> , O <sub>2</sub> , C <sub>3</sub> H <sub>6</sub> , 200 °C <sup>f</sup>                                                                                                    | 0.5                                              | 9               | Acrolein (78%) + others <sup>i</sup> | This work |
| Au/TiO <sub>2</sub>                   | 10% H <sub>2</sub> , O <sub>2</sub> , C <sub>3</sub> H <sub>6</sub> , 50 °C <sup>h</sup>                                                                                                     | 1.1                                              | > 99            | -                                    | [3]       |
| Au/TiO <sub>2</sub>                   | 10% H <sub>2</sub> , O <sub>2</sub> , C <sub>3</sub> H <sub>6</sub> , 90 °C <sup>g</sup>                                                                                                     | 0.5                                              | 20              | Mixture of oxygenates <sup>i</sup>   | [4]       |
| Au/TiO <sub>2</sub>                   | 10% H <sub>2</sub> , O <sub>2</sub> , C <sub>3</sub> H <sub>6</sub> , 200 °C <sup>f</sup>                                                                                                    | 0.2                                              | 22              | Mixture of oxygenates <sup>i</sup>   | This work |
| Au/TS-1                               | 10% H <sub>2</sub> , O <sub>2</sub> , C <sub>3</sub> H <sub>6</sub> , 200 °C <sup>h</sup>                                                                                                    | 0.6                                              | 4               | Propanal (74%)                       | [3]       |
| Au/TS-1                               | 10% H <sub>2</sub> , O <sub>2</sub> , C <sub>3</sub> H <sub>6</sub> , 200 °C <sup>i</sup>                                                                                                    | 2.0                                              | 83              | Mixture of oxygenates <sup>i</sup>   | [5]       |
| Au/TS-1                               | 10% H <sub>2</sub> , O <sub>2</sub> , C <sub>3</sub> H <sub>6</sub> , 200 °C <sup>f</sup>                                                                                                    | 1.7                                              | 89              | Propanal, acetaldehyde               | This work |
| Au/TS-1U                              | 10% H <sub>2</sub> , O <sub>2</sub> , C <sub>3</sub> H <sub>6</sub> , 200 °C <sup>f</sup>                                                                                                    | 3.0                                              | 9               | Propanal (78%)                       | This work |
| Au/TiO <sub>2</sub> -SiO <sub>2</sub> | 10% H <sub>2</sub> , O <sub>2</sub> , C <sub>3</sub> H <sub>6</sub> , 200 °C <sup>f</sup>                                                                                                    | 1.9                                              | 83              | CO <sub>2</sub> (5%)                 | [6]       |
| Au/TiO <sub>2</sub> -SiO <sub>2</sub> | 10% H <sub>2</sub> , O <sub>2</sub> , C <sub>3</sub> H <sub>6</sub> , 200 °C <sup>f</sup>                                                                                                    | 3.6                                              | 77              | Mixture of oxygenates <sup>i</sup>   | This work |
| Au/TiO <sub>2</sub> -SiO <sub>2</sub> | Promoted by Ba(NO <sub>3</sub> ) <sub>2</sub> and trimethylsilane<br>10% H <sub>2</sub> , O <sub>2</sub> , C <sub>3</sub> H <sub>6</sub> , <20 ppm NEt <sub>3</sub> ,<br>150 °C <sup>h</sup> | 8.5                                              | 91              | n.m.                                 | [7]       |

n.m.: not mentioned <sup>a</sup> Conditions: gas concentrations in an inert carrier gas (N<sub>2</sub>, He or Ar) and temperature <sup>b</sup> conversion of propene. <sup>c</sup> GHSV 72,000 h<sup>-1</sup>, <sup>d</sup> flow 60,000 mL/g<sub>cat</sub>/h, <sup>e</sup> flow 311 mL/g<sub>cat</sub>/h, <sup>f</sup> flow 10,000 mL/g<sub>cat</sub>/h, <sup>g</sup> flow ca 2,300 mL/g<sub>cat</sub>/h, <sup>h</sup> flow 4,000 mL/g<sub>cat</sub>/h, <sup>i</sup> flow 6,600 mL/g<sub>cat</sub>/h, <sup>i</sup> flow 14,000 mL/g<sub>cat</sub>/h, <sup>i</sup> Mixture containing propanal, acetone, acetaldehyde, acrolein and/or CO<sub>2</sub>.



#### S4. Deactivation of Au/TiO<sub>2</sub>

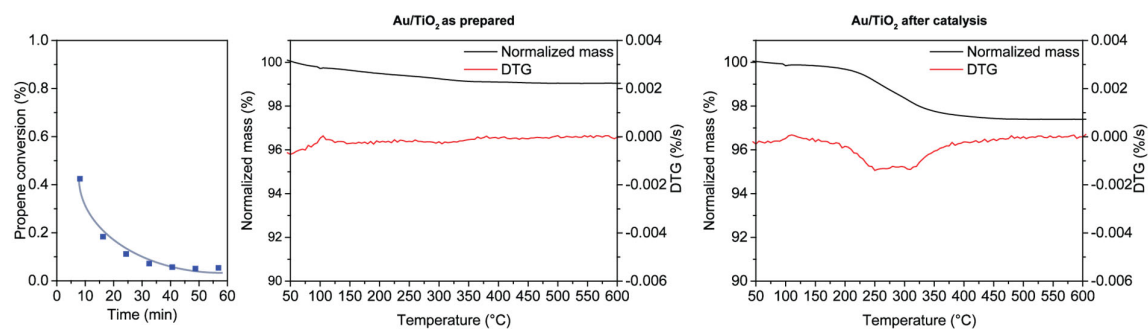

**Figure S6.** Au/TiO<sub>2</sub> catalyst in propene epoxidation propene conversion at 100 °C (a) and thermogravimetric analysis of the Au/TiO<sub>2</sub> before catalysis (b) and after the catalytic test (c).

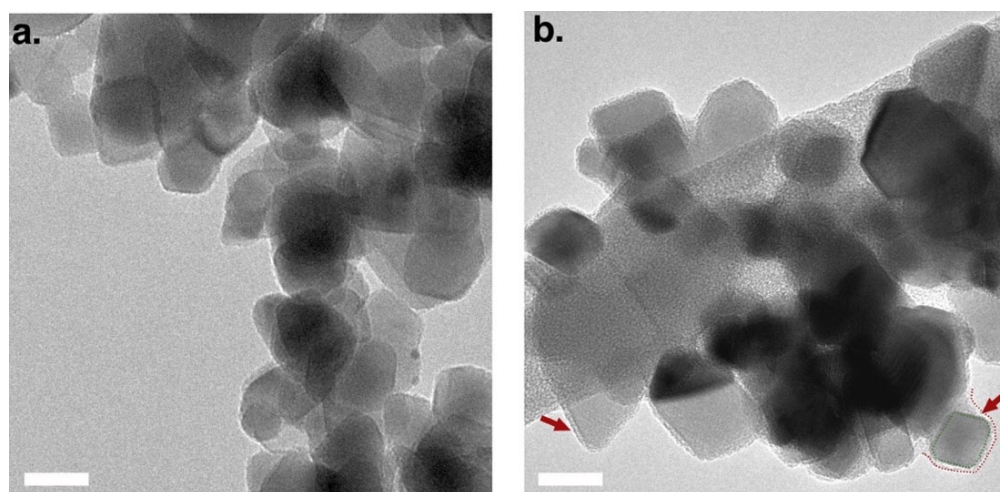

**Figure S7.** Representative Transmission Electron Microscopy micrographs of Au/TiO<sub>2</sub> before (a) and after catalytic propene epoxidation (b). The scalebar indicates 20 nm.

## S5. N<sub>2</sub> Physisorption

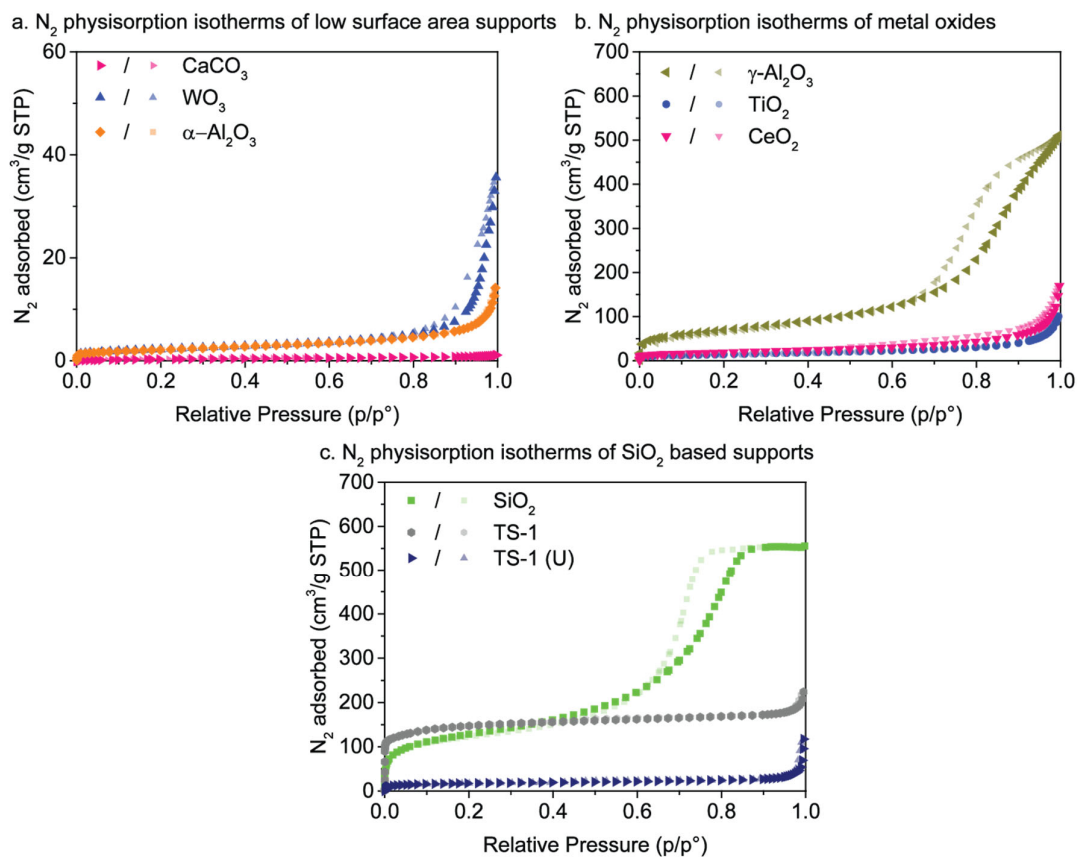

**Figure S8.** N<sub>2</sub> physisorption isotherms of the indicated metal oxide supports. The darker colored symbols represents the adsorption isotherm and faded symbols represent desorption isotherm. The TS-1U represents the TS-1 sample before a thermal decomposition step at 500 °C.

## S6. FTIR with adsorption and desorption of Pyridine

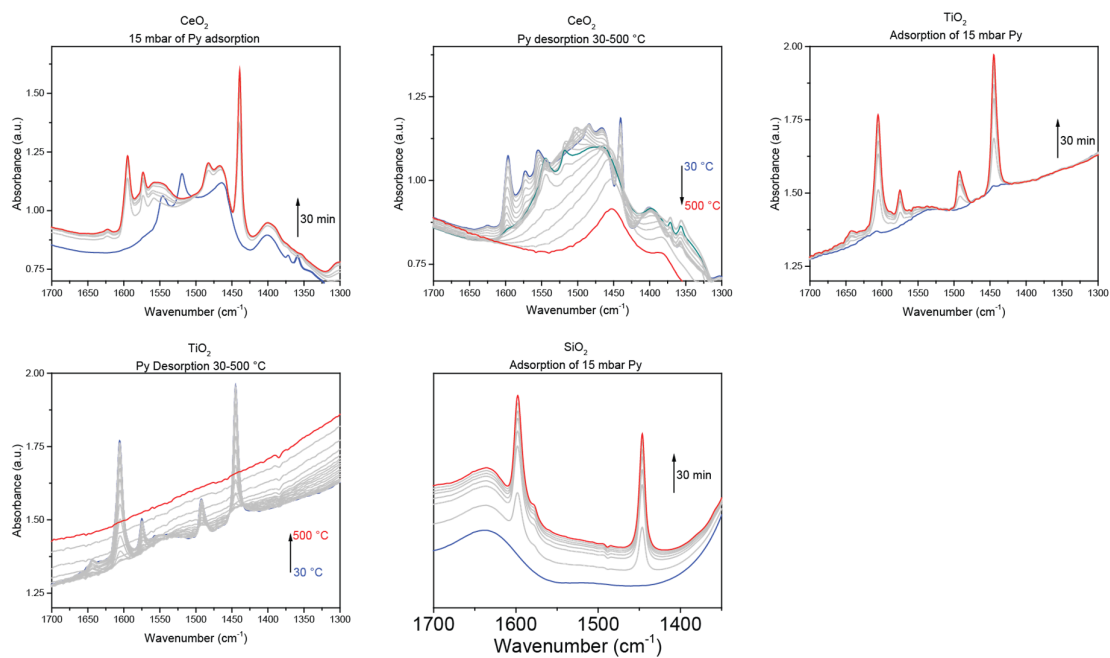

**Figure S9.** FTIR spectra of pyridine adsorption and desorption of the indicated oxide supports.

## S7. NH<sub>3</sub>-TPD

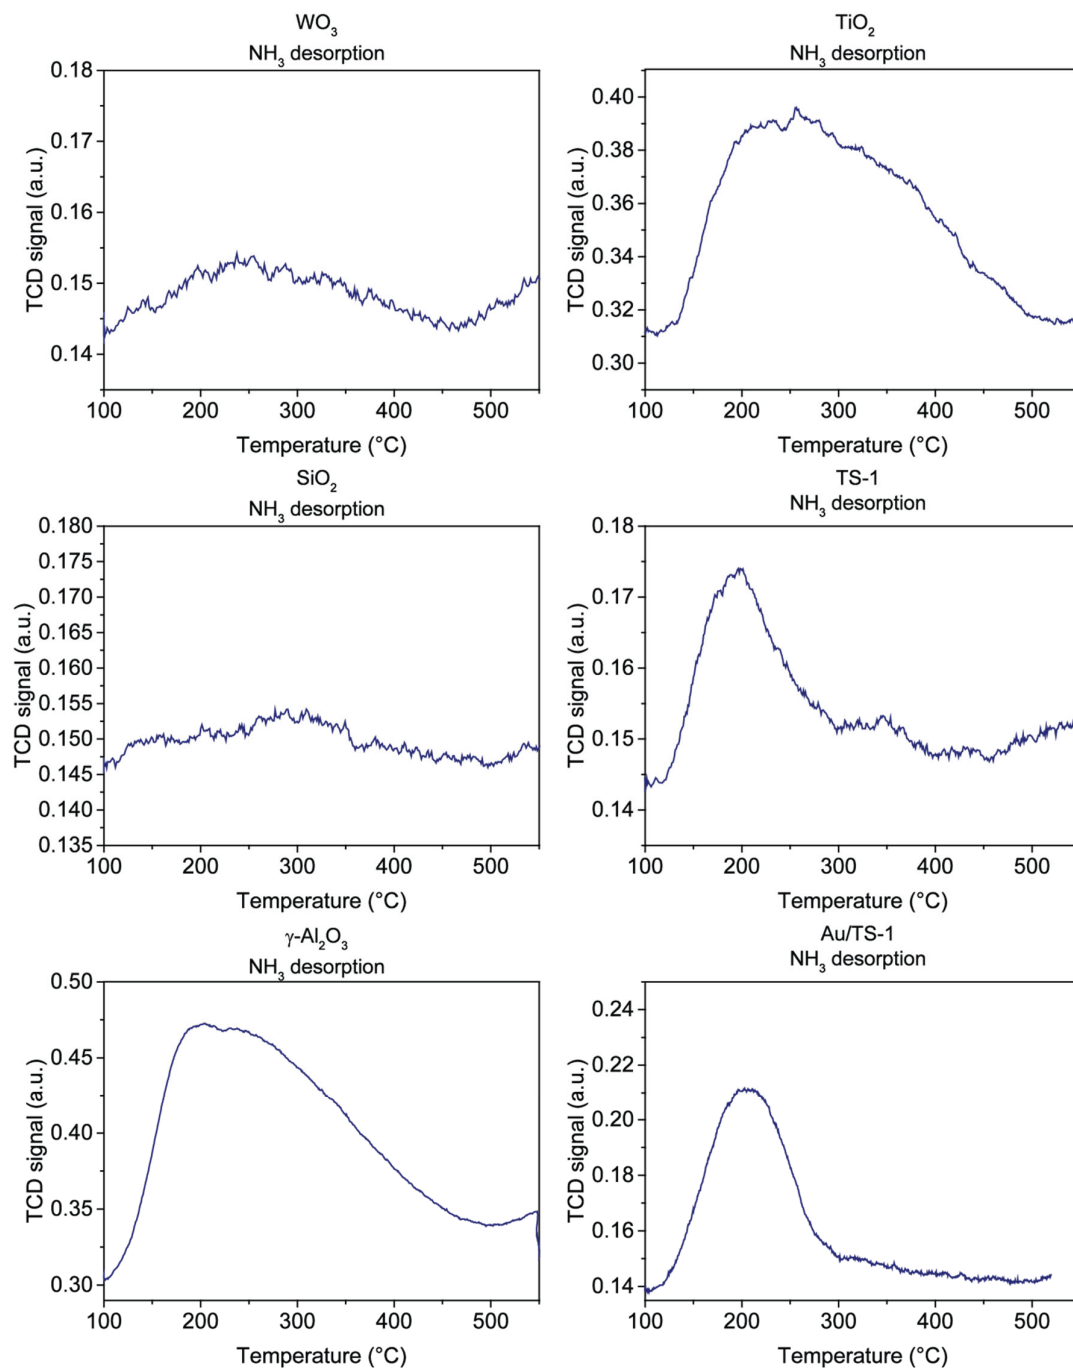

**Figure S10.** NH<sub>3</sub> temperature programmed desorption of the indicated oxide supports.

## S8. Diffuse Reflectance UV-Vis

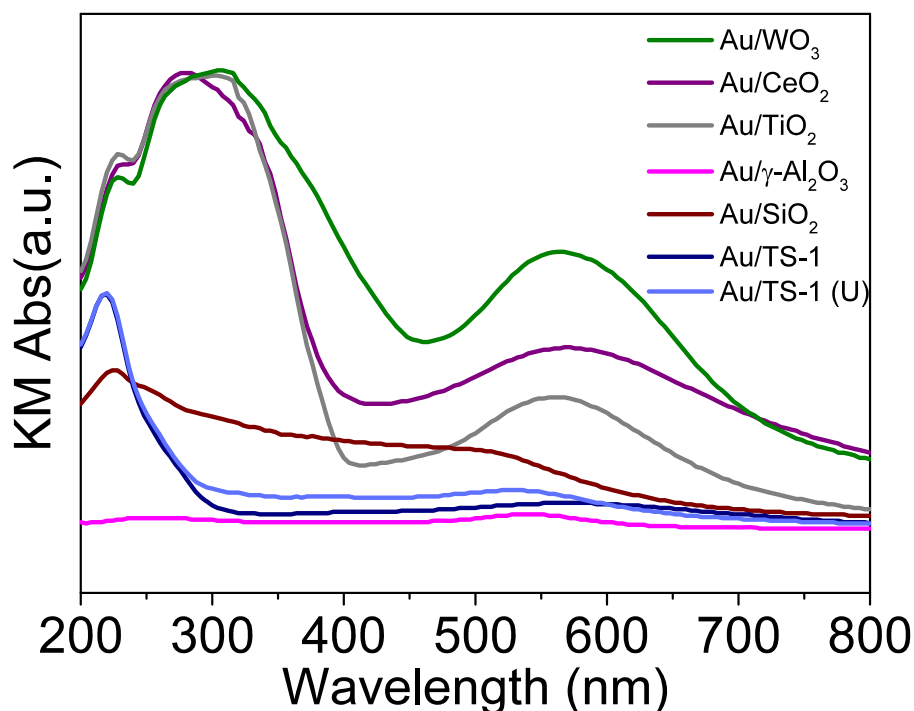

Figure S11. Diffuse Reflectance UV-Vis absorbance spectra of the supported Au catalysts.

### References

1. Delannoy, L.; Fajerweg, K.; Lakshmanan, P.; Potvin, C.; Méthivier, C.; Louis, C. Supported gold catalysts for the decomposition of VOC: Total oxidation of propene in low concentration as model reaction. *Appl. Catal. B Environ.* **2010**, *94*, 117–124. <https://doi.org/10.1016/j.apcatb.2009.10.028>.
2. Cant, N.W.; Hall, W.K. Catalytic oxidation. IV. Ethylene and propylene oxidation over gold. *J. Phys. Chem.* **1971**, *75*, 2914–2921. <https://doi.org/10.1021/j100688a007>.
3. Haruta, M.; Uphade, B.S.; Tsubota, S.; Miyamoto, A. Selective oxidation of propylene over gold deposited on titanium-based oxides. *Res. Chem. Intermed.* **1998**, *24*, 329–336. <https://doi.org/10.1163/156856798X00276>.
4. Nijhuis, T.A.; Huizinga, B.J.; Makkee, M.; Moulijn, J.A. Direct Epoxidation of Propene Using Gold Dispersed on TS-1 and Other Titanium-Containing Supports. *Ind. Eng. Chem. Res.* **1999**, *38*, 884–891. <https://doi.org/10.1021/ie980494x>.
5. Lee, W.S.; Cem Akatay, M.; Stach, E.A.; Ribeiro, F.H.; Nicholas Delgass, W. Gas-phase epoxidation of propylene in the presence of H<sub>2</sub> and O<sub>2</sub> over small gold ensembles in uncalcined TS-1. *J. Catal.* **2014**, *313*, 104–112. <https://doi.org/10.1016/j.jcat.2014.02.013>.
6. Chen, J.; Halin, S.J.A.; Pidko, E.A.; Verhoeven, M.W.G.M.T.; Ferrandez, D.M.P.; Hensen, E.J.M.; Schouten, J.C.; Nijhuis, T.A. Enhancement of Catalyst Performance in the Direct Propene Epoxidation: A Study into Gold-Titanium Synergy. *ChemCatChem* **2013**, *5*, 467–478. <https://doi.org/10.1002/cctc.201200572>.
7. Chowdhury, B.; Bravo-Suárez, J.J.; Daté, M.; Tsubota, S.; Haruta, M. Trimethylamine as a gas-phase promoter: Highly efficient epoxidation of propylene over supported gold catalysts. *Angew. Chemie Int. Ed.* **2006**, *45*, 412–415. <https://doi.org/10.1002/anie.200502382>.
